# Supplementary material
Source: PubMed Central journal article supplement (PMC4172586)

**Supplemental Figure 1: Multiple-Field Image Examples of Different POD-Positive Nuclei Percentages.** HeLa cells were seeded in a 384-well plate, and treated with either DMSO (*top row*), 0.12 U/ $\mu$ L IFN- $\gamma$  (*middle row*), or 4 U/ $\mu$ L IFN- $\gamma$  (*bottom row*). Cells were immunostained for PODs (mouse monoclonal anti-PML and Alexa Fluor 488 chicken anti-mouse antibodies; *green*), incubated in DAPI (nuclear stain; 100 ng/mL; *blue*), imaged using the Cell Lab IC-100 Image Cytometer (40x 0.6NA ELWD Plan Fluor objective), and quantified. Algorithm-determined POD-positive cell percentages are shown on the left of each image set. Four fields are shown for each image (*marked by the red lines*).

# SUPPLEMENTAL FIGURE 1

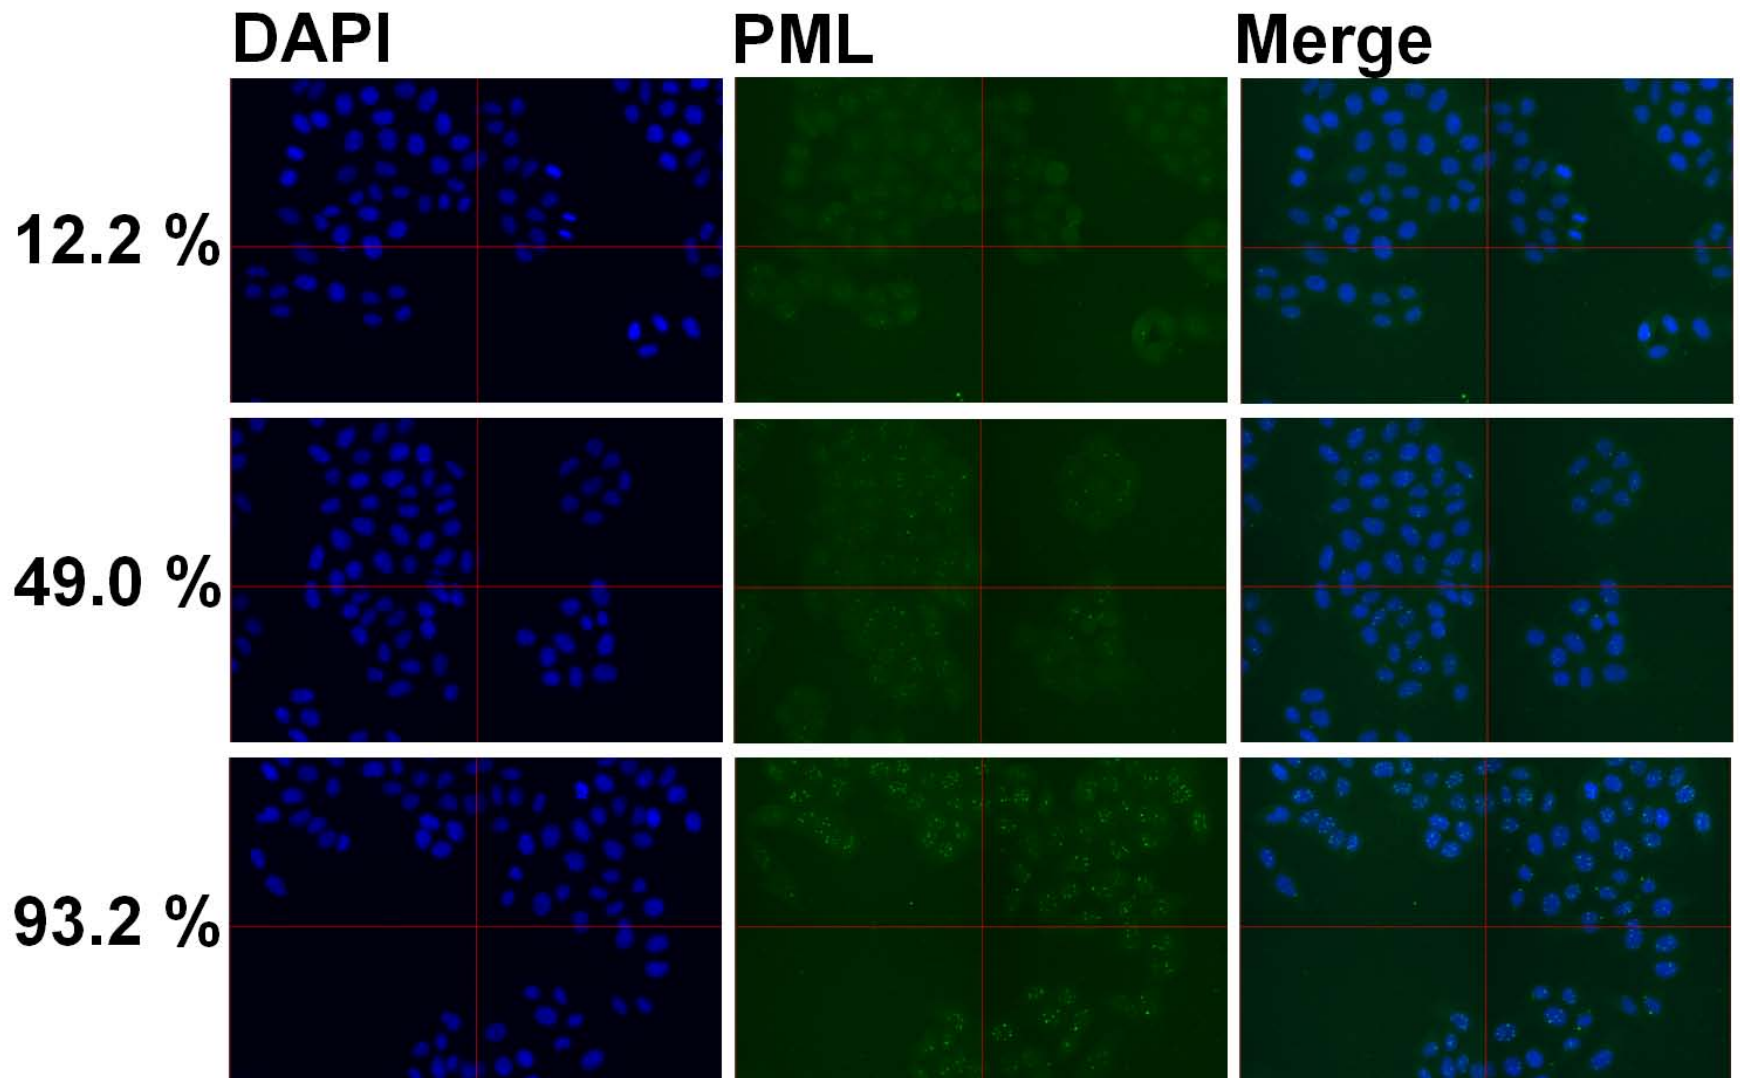

Supplement: NIHMS629616-supplement-01.pdf [file NIHMS629616-supplement-01.pdf]
